# Supplementary material
Source: PubMed Central journal article supplement (PMC6133224)
Supplement: mpa-47-958-s002.pdf [file mpa-47-958-s002.pdf]

Long-Term Survivors of Pancreatic Cancer  
A California Population-Based Study

**SUPPLEMENTAL TABLE 1.** Associations of Patient, Tumor, and Facility Characteristics With 5-Year Survival, Stratified by Surgical Status With Year of Diagnosis Dichotomized Before and After the Approval of Gemcitabine

|                                                             | OR (95% CI)<br>Unresected | OR (95% CI)<br>Surgically Resected |
|-------------------------------------------------------------|---------------------------|------------------------------------|
| Age (per year)                                              | <b>0.97 (0.96-0.98)</b>   | <b>0.99 (0.98-1.00)</b>            |
| Sex                                                         |                           |                                    |
| Female vs male                                              | 0.97 (0.75-1.25)          | <b>1.22 (1.04-1.43)</b>            |
| Race/Ethnicity                                              |                           |                                    |
| Asian/Pacific Islander vs Non-Hispanic White                | <b>3.48 (2.51-4.82)</b>   | 0.97 (0.73-1.29)                   |
| Hispanic vs Non-Hispanic White                              | <b>1.82 (1.28-2.60)</b>   | 1.08 (0.84-1.38)                   |
| Non-Hispanic Black vs Non-Hispanic White                    | 1.02 (0.59-1.74)          | 0.85 (0.60-1.21)                   |
| Degree of differentiation                                   |                           |                                    |
| Moderately vs poorly differentiated/anaplastic              | 0.87 (0.55-1.37)          | <b>1.66 (1.36-2.03)</b>            |
| Unknown differentiation vs poorly differentiated/anaplastic | 1.01 (0.71-1.44)          | <b>2.10 (1.52-2.88)</b>            |
| Well-differentiated vs poorly differentiated/anaplastic     | <b>2.53 (1.62-3.94)</b>   | <b>3.23 (2.51-4.16)</b>            |
| Anatomic location                                           |                           |                                    |
| Body of pancreas vs head of pancreas                        | 0.84 (0.54-1.33)          | 0.94 (0.65-1.36)                   |
| Overlapping, other, NOS vs head of pancreas                 | 1.02 (0.75-1.38)          | 1.05 (0.82-1.35)                   |
| Tail of pancreas vs head of pancreas                        | 0.82 (0.48-1.40)          | 1.12 (0.81-1.55)                   |
| SEER summary stage                                          |                           |                                    |
| Localized vs distant                                        | <b>3.73 (2.39-5.80)</b>   | <b>12.14 (7.65-19.29)</b>          |
| Regional vs distant                                         | <b>1.91 (1.39-2.64)</b>   | <b>4.15 (2.66-6.48)</b>            |
| Unknown vs distant                                          | <b>3.48 (2.34-5.18)</b>   | <b>6.56 (2.89-14.87)</b>           |
| Radiation                                                   |                           |                                    |
| Yes vs no                                                   | 1.21 (0.86-1.71)          | 0.97 (0.80-1.19)                   |
| Chemotherapy                                                |                           |                                    |
| Yes vs no                                                   | 1.06 (0.79-1.43)          | <b>1.56 (1.27-1.91)</b>            |
| Quintile of neighborhood socioeconomic status               |                           |                                    |
| 2 vs 1                                                      | <b>0.63 (0.40-0.97)</b>   | 1.16 (0.83-1.60)                   |
| 3 vs 1                                                      | 0.75 (0.49-1.14)          | 1.23 (0.90-1.69)                   |
| 4 vs 1                                                      | 0.91 (0.60-1.37)          | <b>1.41 (1.04-1.92)</b>            |
| 5 vs 1                                                      | 0.96 (0.64-1.46)          | <b>1.63 (1.20-2.20)</b>            |
| NCI cancer center                                           |                           |                                    |
| Yes vs no                                                   | <b>1.65 (1.20-2.27)</b>   | <b>1.38 (1.15-1.65)</b>            |
| Year of diagnosis                                           |                           |                                    |
| 1997-2009 vs 1988-1996                                      | 1.11 (0.84-1.48)          | <b>1.68 (1.37-2.06)</b>            |

Values in bold signify statistically significant association at  $P < 0.05$ .
